# Supplementary material
Source: Springer Nature journal article supplement (https://www.springermedizin.de/resource/supplementary/12885_2011_2787_MOESM4_ESM.pdf/9461912)

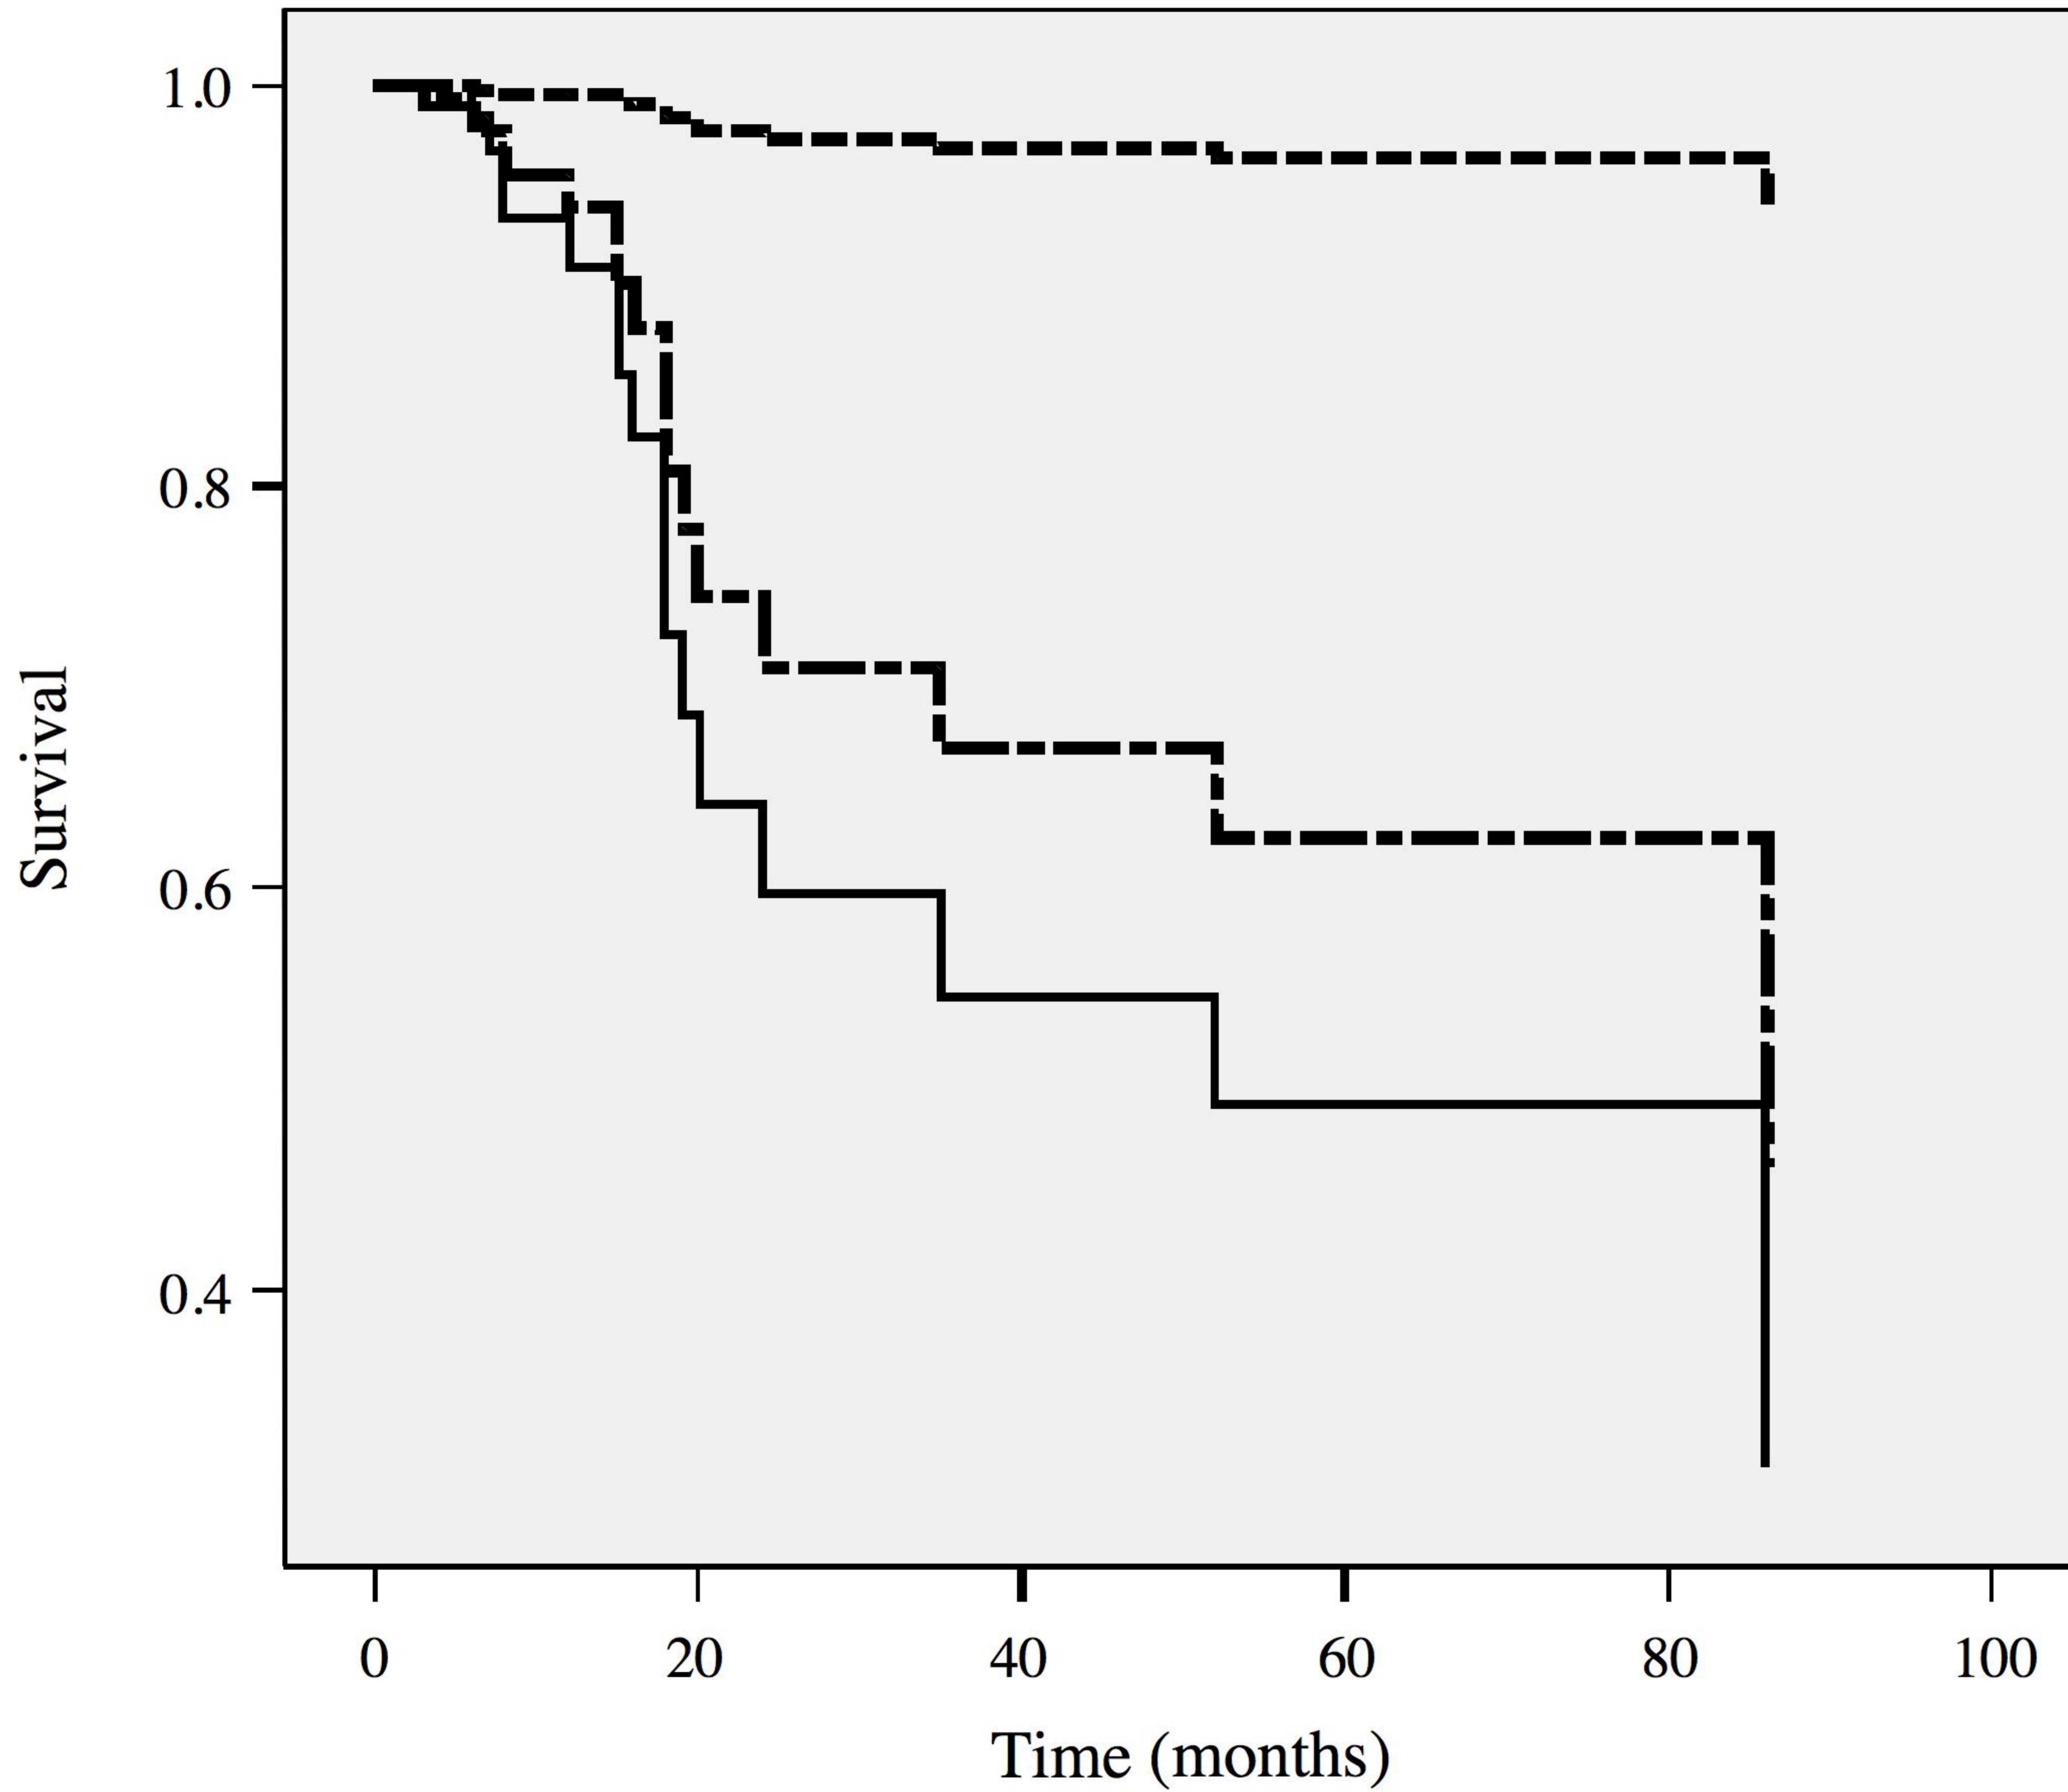

Combined expression of PAI-1 mRNA and uPAR-del4/5 mRNA in R0 STS patients

- group 1
- group 2
- group 3

Supplement: MOESM4 [file 9461912]
